# Supplementary material
Source: PubMed Central journal article supplement (PMC7017738)
Supplement: ajcr0010-0148-f8.pdf [file ajcr0010-0148-f8.pdf]

# Running title ADAR1 stabilizes c-Myc

**Table S1.** Sequences of gene-specific shRNAs

|          |                                                                  |
|----------|------------------------------------------------------------------|
| shADAR-1 | 5'-CCGGGCCCACTGTTATCTTCACTTTCTCGAGAAAGTGAAGATAACAGTGGGCTTTTTG-3' |
| shADAR-2 | 5'-CCGGGCTGTTAGAAATATGCCAGTTCTCGAGAACTGGGCATATTCTAACAGCTTTTTG-3' |
| shEZH2-1 | 5'-CCGGGCTAGGTTAATTGGGACCAAACTCGAGTTTGGTCCCAATTAACCTAGCTTTTTG-3' |
| shEZH2-2 | 5'-CCGGCCCAACATAGATGGACCAATCTCGAGATTGGTCCATCTATGTTGGGTTTTTG-3'   |

**Table S2.** Sequences of RT-qPCR primers

| Species | Gene         | Forward (5'-3')      | Reverse (5'-3')      |
|---------|--------------|----------------------|----------------------|
| Human   | <i>GAPDH</i> | ACCCAGAAGACTGTGGATGG | TTCAGCTCAGGGATGACCTT |
| Human   | <i>ADAR1</i> | TGCTGCTGAATTCAAGTTGG | TCGTTCTCCCAATCAAGAC  |
| Human   | <i>Myc</i>   | TTCGGGTAGTGAAAACCAG  | CAGCAGCTCGAATTTCTTCC |
